# Supplementary material for: Fracture risk in chronic kidney disease: A Korean population-based cohort study
Source: PubMed Central journal article supplement — Kidney Res Clin Pract. 2019 Jun 30;38(2):220–8. doi: 10.23876/j.krcp.18.0099 (PMC6577209; doi:10.23876/j.krcp.18.0099), 2019-06-30
Supplement: krcp-38-220_Supple.pdf [file krcp-38-220_Supple.pdf]

**Supplementary Table 1. Number of fractures per 1,000 person-years for patients with CKD according to age/sex groups**

| Age (yr)                               | Sex    | Pre-dialysis CKD       |                      | Hemodialysis           |                      | Peritoneal dialysis     |                      |
|----------------------------------------|--------|------------------------|----------------------|------------------------|----------------------|-------------------------|----------------------|
|                                        |        | Number of fracture (n) | Total (person-years) | Number of Fracture (n) | Total (person-years) | Number of fractures (n) | Total (person-years) |
| < 65                                   | Male   | 2,358                  | 55,452               | 653                    | 11,046               | 68                      | 1,655                |
|                                        | Female | 1,735                  | 35,854               | 405                    | 6,051                | 49                      | 1,175                |
| ≥ 65                                   | Male   | 4,255                  | 62,097               | 586                    | 5,874                | 34                      | 438                  |
|                                        | Female | 6,306                  | 44,745               | 762                    | 4,552                | 49                      | 340                  |
| Total                                  |        | 14,654                 | 198,148              | 2,406                  | 27,523               | 200                     | 3,608                |
| Fracture number per 1,000 person-years |        |                        | 74                   |                        | 87                   |                         | 55                   |

CKD, chronic kidney disease.
